# Supplementary material for: Human ecological and social determinants of dental caries among the Xavante Indigenous people in Central Brazil
Source: PubMed Central journal article supplement (PMC6300322; doi:10.1371/journal.pone.0208312), 2018-12-19
Supplement: pone.0208312.s001.pdf [file pone.0208312.s001.pdf]

## S1 Interview Questions

### Portuguese language interview questions utilized in statistical analyses

#### Perguntas na entrevista domiciliar

- 1) Com qual frequência os membros de sua casa costumam comer cada alimento de cultivo ou criação ao longo do ano? (respostas: 1–nunca ou raramente; 2–só às vezes ou só em uma época; 3–freqüente-mente ou todo dia; 99–IGN):
  - a) Arroz da roça
  - b) Milho Xavante
  - c) Milho não-Xavante
  - d) Abóbora
  - e) Feijão Xavante
  - f) Feijão não-Xavante
  - g) Mandioca/farinha
  - h) Batata doce
  - i) Raízes e tubérculos cultivados
  - j) Melancia
  - k) Cana
  - l) Banana
  - m) Mamão
  - n) Frango de criação
  - o) Ovos de galinha de criação
  - p) Carne de boi de criação
  
- 2) Com qual frequência os membros de sua casa costumam comer cada alimento do mato ou rio ao longo do ano? (respostas: 1–nunca ou raramente; 2–só às vezes ou só em uma época; 3–freqüente-mente ou todo dia; 99–IGN):
  - a) Frutas do mato
  - b) Raízes/tubérculos
  - c) Palmitos
  - d) Mel
  - e) Peixe
  - f) Carne de tartaruga, tracajá ou jabuti
  - g) Ovos de tartaruga ou tracajá
  - h) Aves silvestres
  - i) Caça pequena
  - j) Caça de grande porte
  - k) Formigas
  
- 3) Com qual frequência os membros de sua casa costumam comer cada alimento da cidade ao longo do ano? (respostas: 1–nunca ou raramente; 2–só às vezes ou só em uma época; 3–freqüente-mente ou todo dia; 99–IGN):
  - a) Arroz comprado
  - b) Feijão comprado
  - c) Frango congelado
  - d) Ovos de frango comprados
  - e) Carne de boi ou linguiça
  - f) Peixe congelado
  - g) Café
  - h) Açúcar
  - i) Sal ou Arisco
  - j) Óleo de cozinha
  - k) Extrato de tomate
  - l) Cebola ou alho
  - m) Macarrão
  - n) Trigo ou pão
  - o) Bolachas, biscoitos ou salgadinhos
  - p) Refrigerante ou suco em pó
  - q) Balinhas ou bombons

- 4) Para cada item, indique a quantidade que os membros da sua casa possuem:
- |                               |                           |
|-------------------------------|---------------------------|
| a) Televisão                  | l) Câmera de vídeo        |
| b) DVD                        | m) Computador ou notebook |
| c) Antena parabólica          | n) Espingarda             |
| d) Fogão a gás                | o) Revólver               |
| e) Máquina de costura         | p) Rede de pesca          |
| f) Gravador de fita (pequeno) | q) Moto                   |
| g) Som portátil               | r) Automóvel              |
| h) MP3/MP4/etc.               | s) Bicicleta              |
| i) Telefone celular           | t) Motor/gerador          |
| j) Câmera de rolo de filme    | u) Caixa de som           |
| k) Câmera digital             | v) Geladeira ou freezer   |
- 5) Atualmente, quais são os valores das rendas dos membros da sua casa? (incluir salários, aposentadorias, pensões, bolsas família, auxílios, freelance, etc.)

### **Perguntas na entrevista individual**

- 1) Qual é seu sexo? (respostas: 0–homem; 1–mulher)
- 2) Qual é sua data de nascimento?
  - a) Se não se sabe sua data de nascimento, quantos anos você tem?
- 3) Você costuma limpar os dentes? (respostas: 0–não; 1–sim; 99–IGN)
  - a) SE SIM, com qual frequência? (respostas: 0–às vezes, quando lembro; 1–uma vez ao dia; 2–duas a três vezes ao dia; 99–IGN)
  - b) SE SIM, o que você costuma fazer/usar? (respostas: 0–pasta de dente e escova; 1–bochechar com água; 2–outro; 99–IGN)
- 4) Você já foi atendido pelo dentista alguma vez? (respostas: 0–não; 1–sim; 99–IGN)
  - a) SE SIM, quando foi a última vez? (respostas: 0–no último ano; 1–há mais de um ano; 99–IGN)

**Interview questions utilized in statistical analyses, translated from original language (Portuguese) to English**

**Questions from household interviews**

1) How frequently do the members of your household usually eat each cultivated or raised food item? (responses: 1–never or rarely; 2–sometimes or seasonally; 3–frequently or daily; 99–unknown or no response):

- |                       |                                |
|-----------------------|--------------------------------|
| a) Planted rice       | i) Cultivated roots and tubers |
| b) Xavante maize      | j) Watermelon                  |
| c) Non-Xavante maize  | k) Sugarcane                   |
| d) Squash             | l) Banana                      |
| e) Xavante beans      | m) Papaya                      |
| f) Non-Xavante beans  | n) Raised chicken              |
| g) Manioc/manioc meal | o) Raised chicken eggs         |
| h) Sweet potato       | p) Raised beef                 |

2) How frequently do the members of your household usually eat each cultivated or raised food item from the forest or river? (responses: 1–never or rarely; 2–sometimes or seasonally; 3–frequently or daily; 99–unknown or no response):

- |                            |                       |
|----------------------------|-----------------------|
| a) Forest fruits           | g) Turtle eggs        |
| b) Roots and tubers        | h) Wild birds         |
| c) Heart of palm           | i) Small game animals |
| d) Honey                   | j) Large game animals |
| e) Fish                    | k) Ants               |
| f) Turtle or tortoise meat |                       |

3) How frequently do the members of your household usually eat each food item from the city? (responses: 1–never or rarely; 2–sometimes or seasonally; 3–frequently or daily; 99–unknown or no response):

- |                           |                                |
|---------------------------|--------------------------------|
| a) Purchased rice         | j) Cooking oil                 |
| b) Purchased beans        | k) Tomato extract              |
| c) Frozen chicken         | l) Onion or garlic             |
| d) Purchased chicken eggs | m) Pasta                       |
| e) Beef or sausage        | n) Wheat flour or bread        |
| f) Frozen fish            | o) Cookies, crackers, or chips |
| g) Coffee                 | p) Soda or powdered juice      |
| h) Sugar                  | q) Candy                       |
| i) Salt                   |                                |

- 4) For each item, indicate the quantity owned by members of your household:
- |                          |                            |
|--------------------------|----------------------------|
| a) Television            | l) Video camera            |
| b) DVD player            | m) Computer or notebook    |
| c) Parabolic antenna     | n) Shotgun                 |
| d) Gas oven              | o) Revolver                |
| e) Sewing machine        | p) Fishing net             |
| f) Tape recorder (small) | q) Motorcycle              |
| g) Portable music player | r) Automobile              |
| h) MP3 player            | s) Bicycle                 |
| i) Cellular telephone    | t) Generator               |
| j) Film camera           | u) Loudspeaker             |
| k) Digital camera        | v) Refrigerator or freezer |
- 5) What are the current income values of members of your household (include wages, pensions, social benefits, freelance income, etc.)?

#### **Questions from individual interviews**

- 5) What is your sex? (responses: 0–male; 1–female)
- 6) What is your date of birth?
- a) If you do not know your birthdate, how old are you?
- 7) How often do you usually clean your teeth? (responses: 0–no; 1–yes; 99–unknown or no response)
- a) IF YES, how frequently? (responses: 0–sometimes, when I remember, 1–once per day; 2–twice or three times per day; 99–unknown or no response)
- b) IF YES, what do you usually do/use? (responses: 0–toothpaste and brush; 1–rinse with water; 2–other; 99–unknown or no response)
- 8) Have you been seen by a dentist at least once? (responses: 0–no; 1–yes; 99–unknown or no response)
- a) IF YES, when was the last time? (responses: 0–during the past year; 1–more than one year ago; 99–unknown or no response)
